# Supplementary material
Source: PubMed Central journal article supplement (PMC7903221)
Supplement: NIHMS1658635-supplement-1.pdf [file NIHMS1658635-supplement-1.pdf]

**Synthesis, characterization, *in vitro* SAR study, and preliminary *in vivo* toxicity evaluation of naphthylmethyl substituted bis-imidazolium salts**

Marie R. Southerland\*, Michael A. DeBord\*, Nicholas A. Johnson, Steven R. Crabtree, Nicolas E. Alexander, Michael L. Stromyer, Patrick O. Wagers, Matthew J. Panzner, Chrys Wesdemiotis, Leah P. Shriver, Claire A. Tessier, Wiley J. Youngs

\* Authors contributed equally to this manuscript

**List of Contents**

|                                                                     |                     |
|---------------------------------------------------------------------|---------------------|
| (A) <sup>1</sup> H NMR of compounds 1-12 (excluding 9 and 11).....  | SI 1a – 10a         |
| (B) <sup>13</sup> C NMR of compounds 1-12 (excluding 9 and 11)..... | SI 1b – 10b         |
| (C) HRMS of compounds 1-12 (excluding 8, 9 and 11).....             | SI 1c – 7c, 9c, 10c |
| (D) Average weight gain chart with error bars.....                  | SI 11               |
| (E) References.....                                                 | SI 12               |

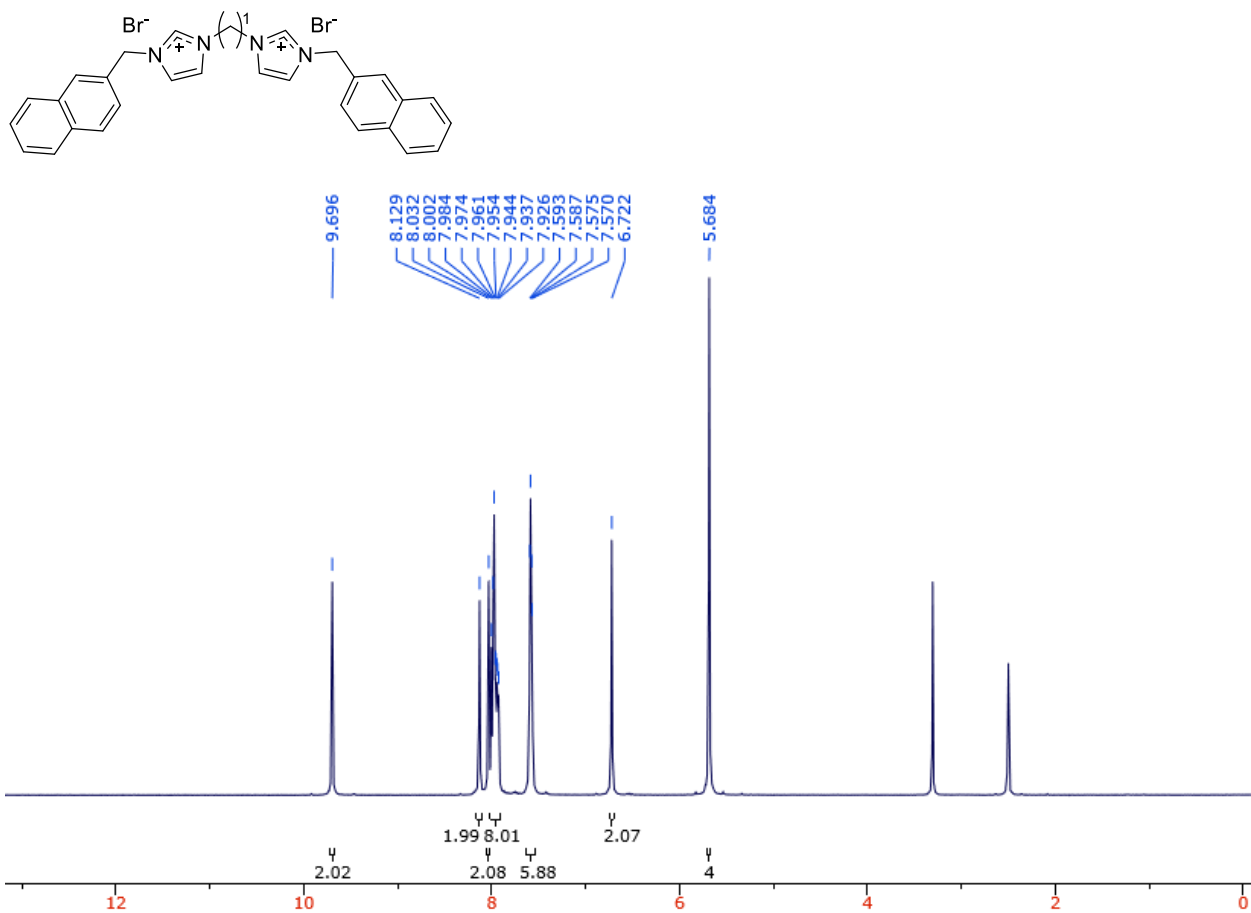

**SI 1a.**  $^1\text{H}$  NMR spectrum of compound **1**

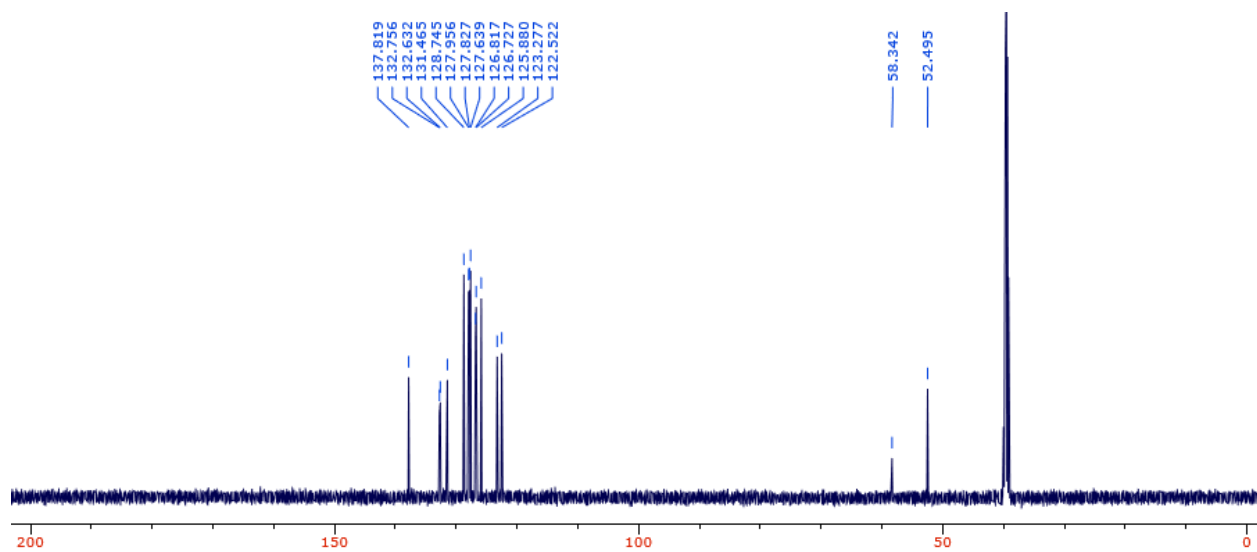

**SI 1b.**  $^{13}\text{C}$  NMR spectrum of compound **1**

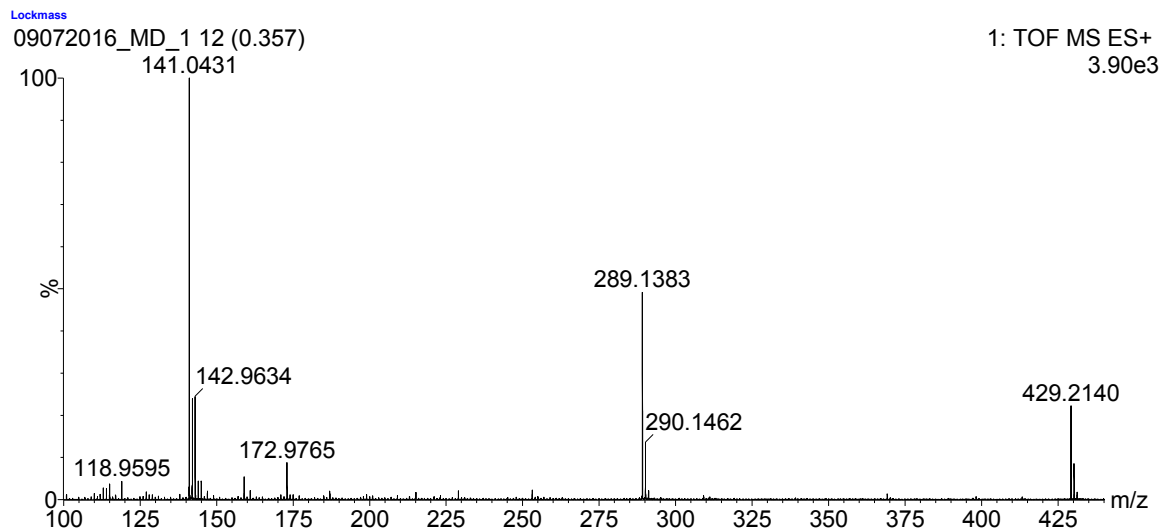

SI 1c. HRMS of compound 1

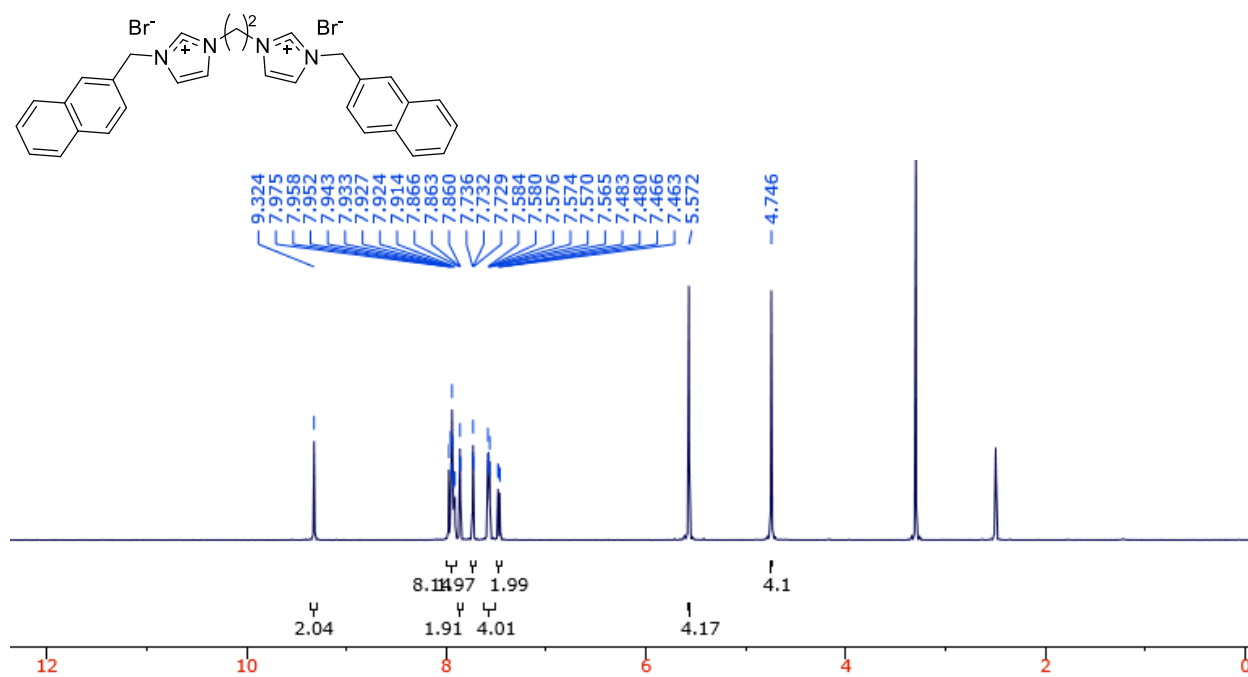

SI 2a. <sup>1</sup>H NMR spectrum of compound 2

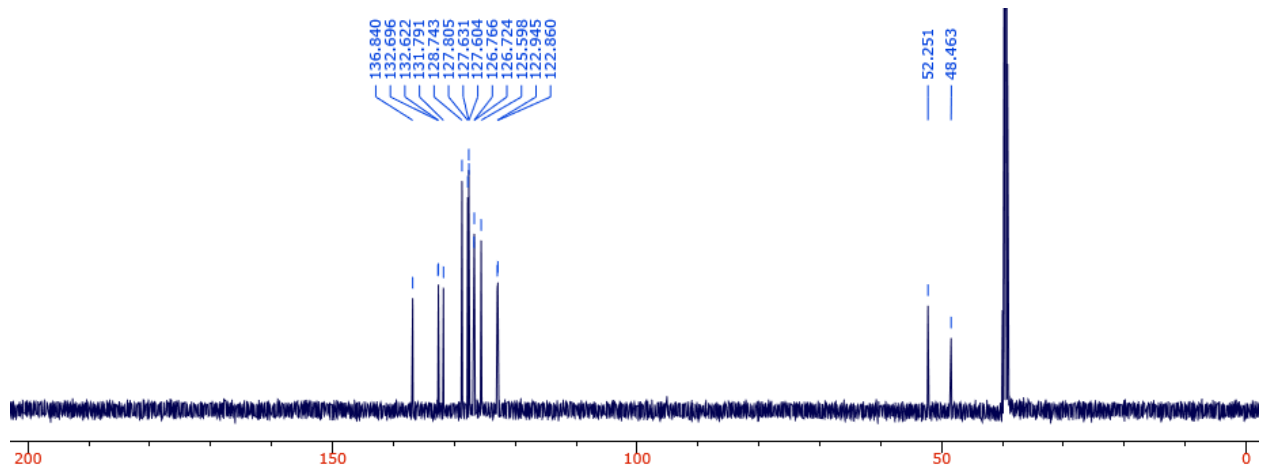

SI 2b.  $^{13}\text{C}$  NMR spectrum of compound 2

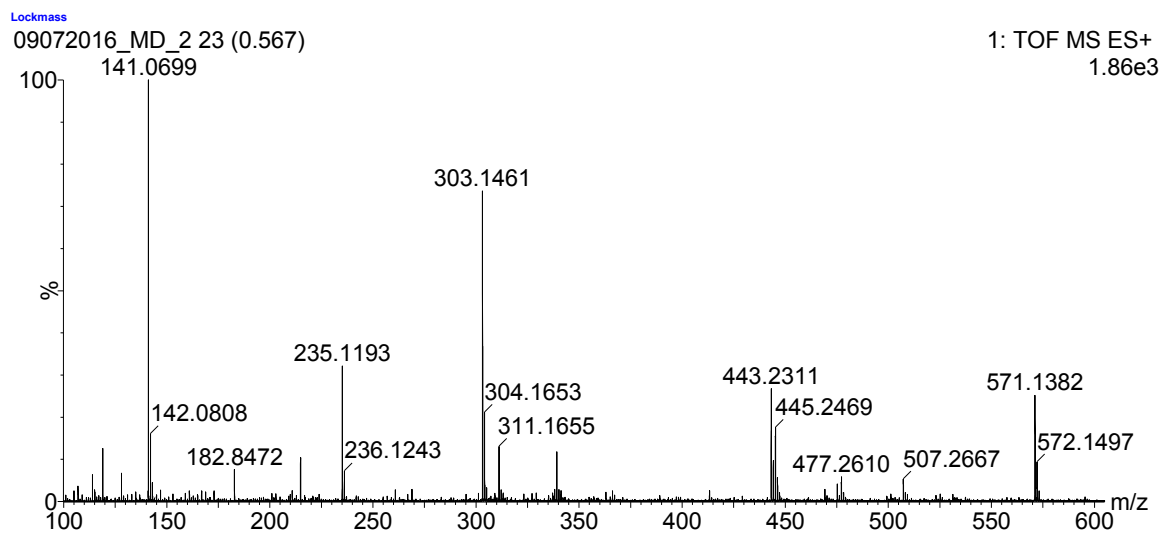

SI 2c. HRMS of compound 2

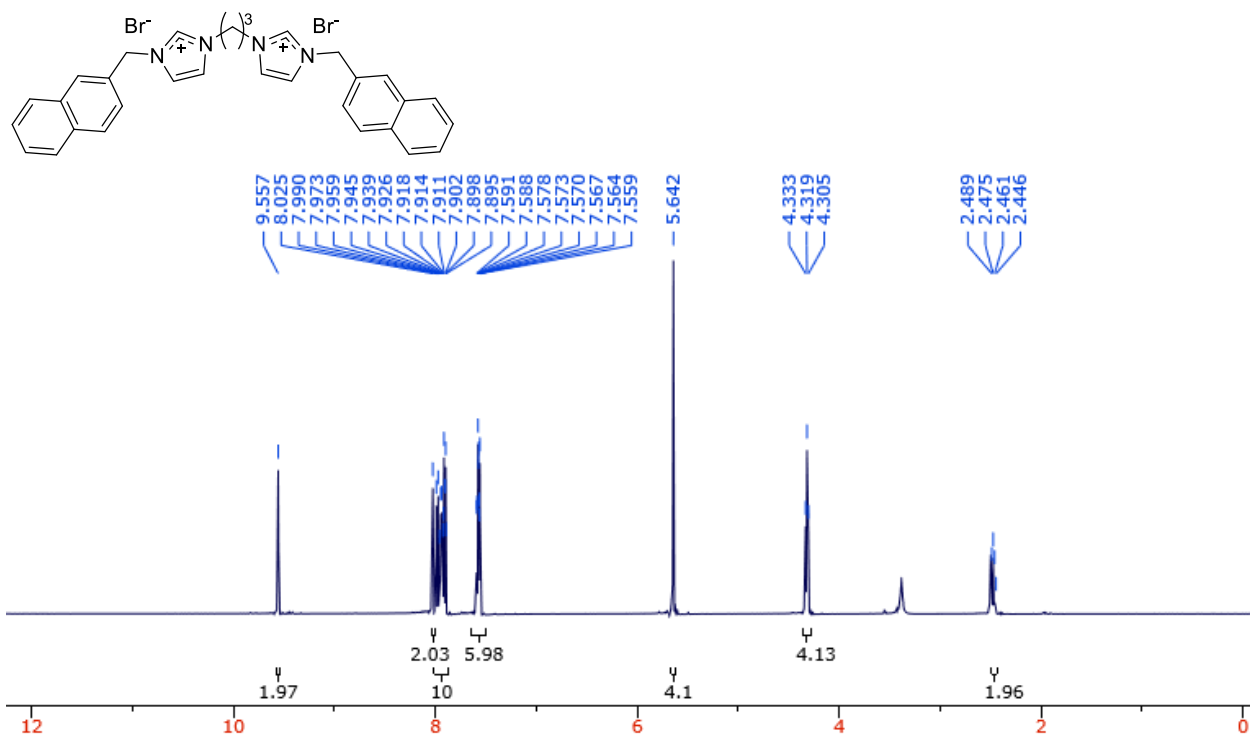

SI 3a. <sup>1</sup>H NMR spectrum of compound 3

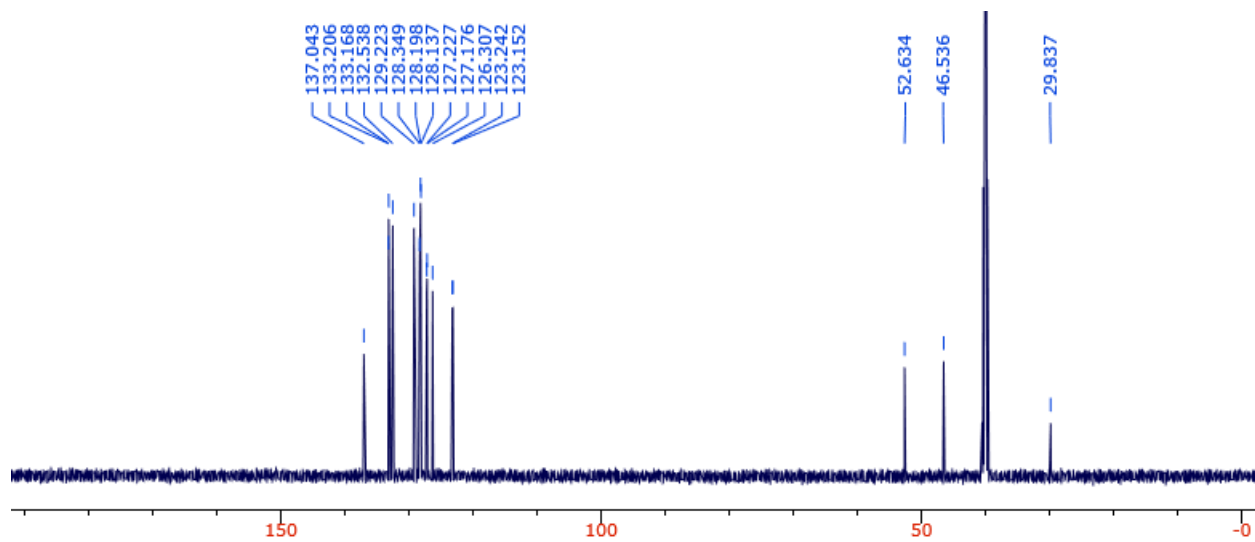

SI 3b. <sup>13</sup>C NMR spectrum of compound 3

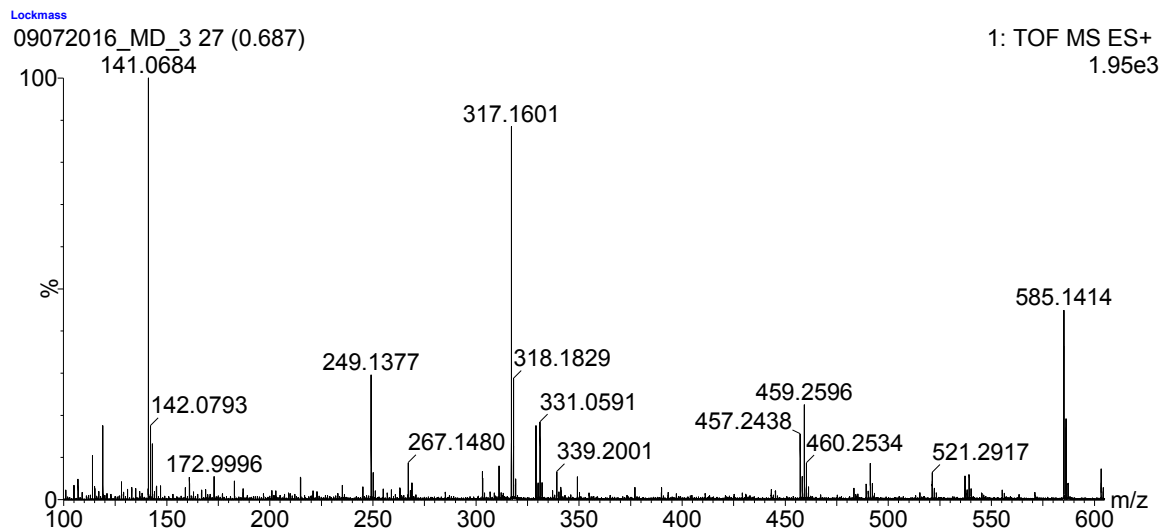

SI 3c. HRMS of compound 3

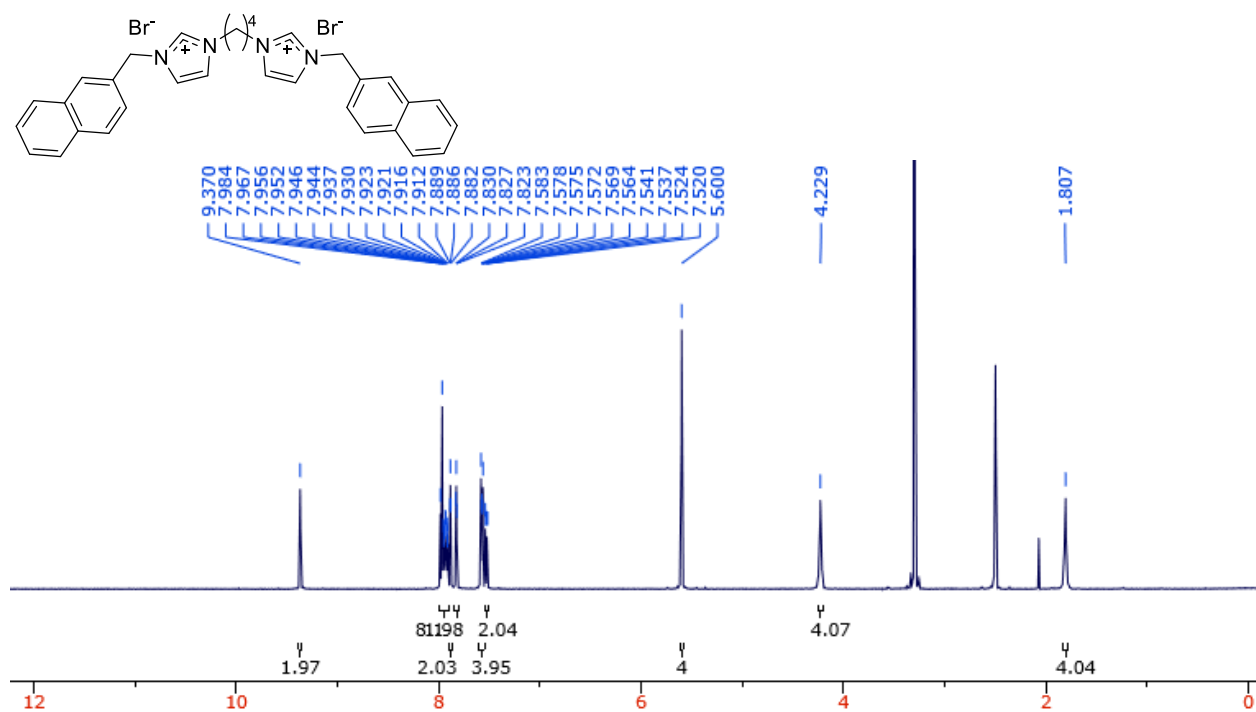

SI 4a. <sup>1</sup>H NMR spectrum of compound 4

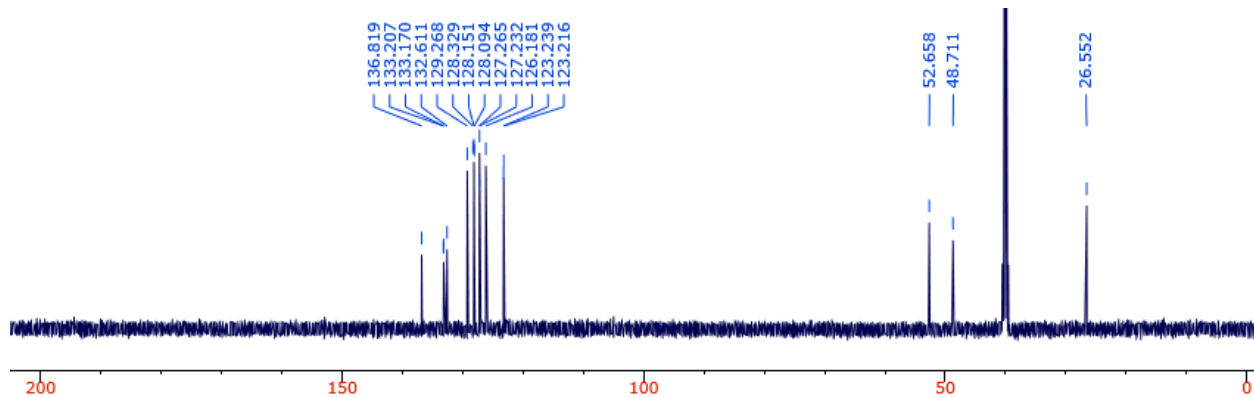

SI 4b. <sup>13</sup>C NMR spectrum of compound 4

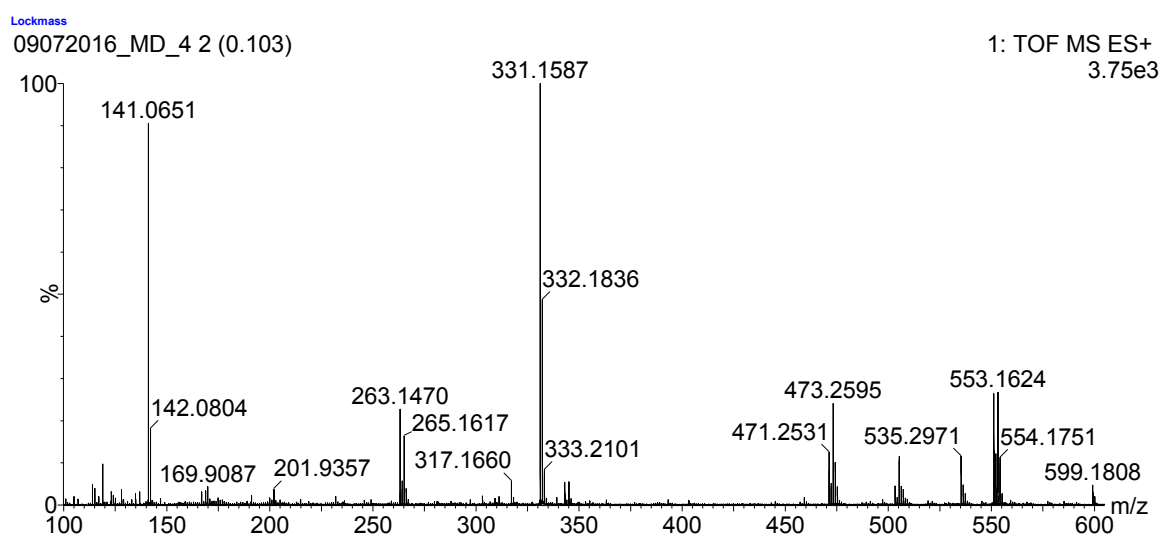

SI 4c. HRMS of compound 4

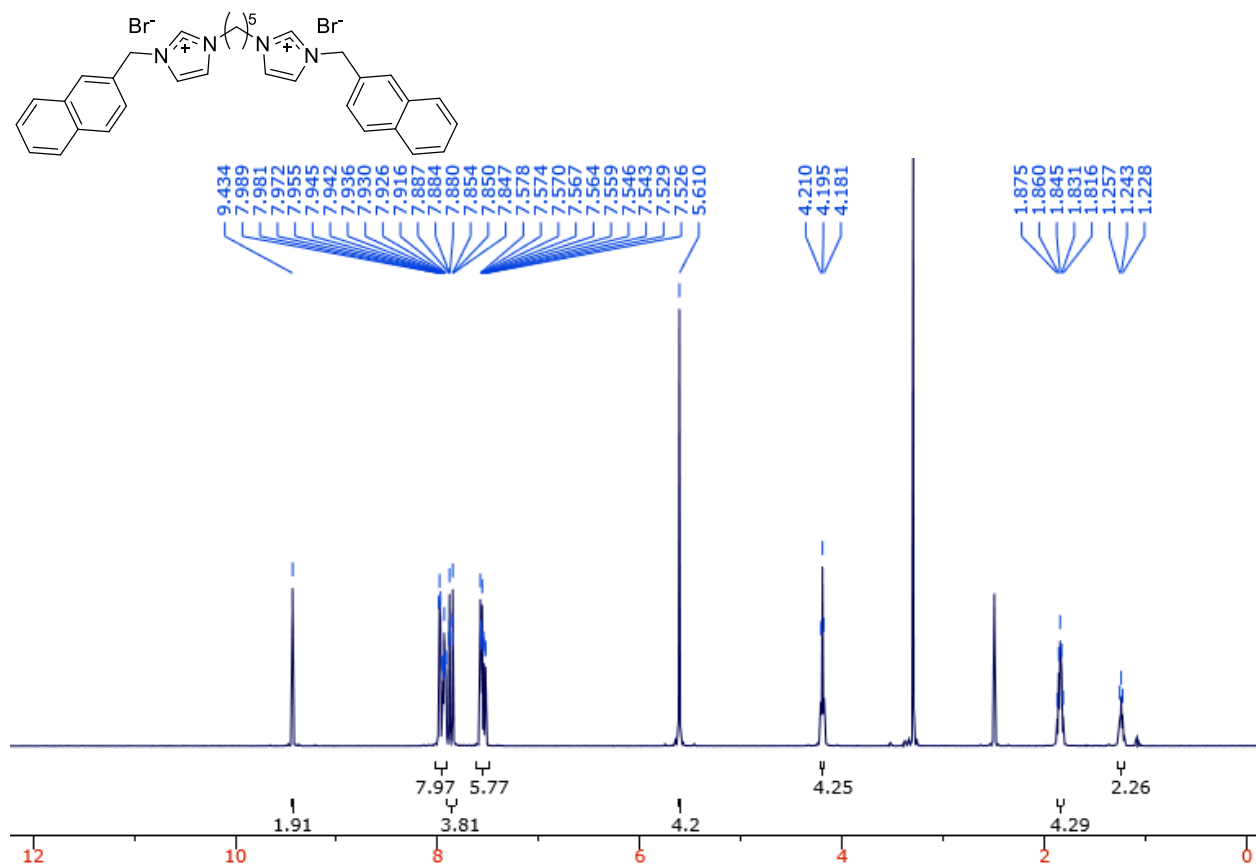

SI 5a. <sup>1</sup>H NMR spectrum of compound 5

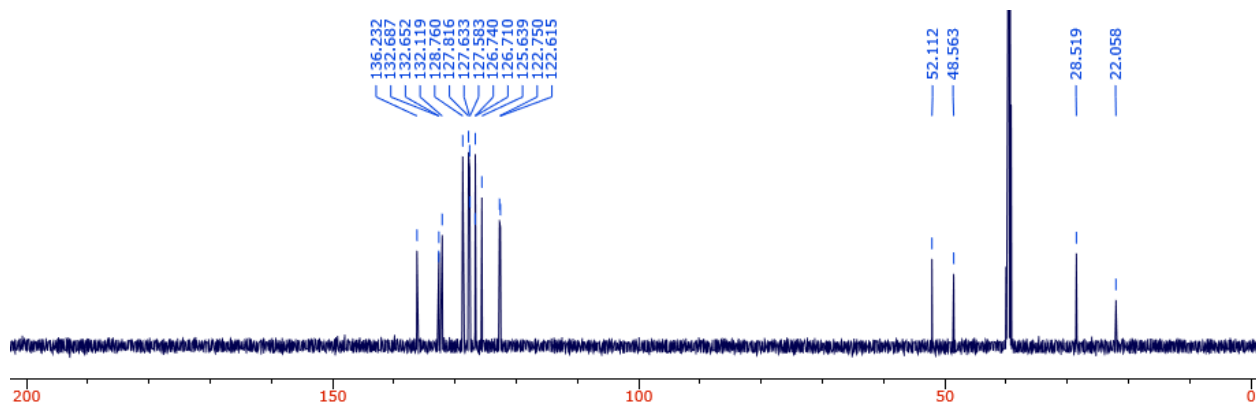

SI 5b. <sup>13</sup>C NMR spectrum of compound 5



Lockmass

09072016\_MD\_5 1 (0.087)

1: TOF MS ES+  
3.60e3

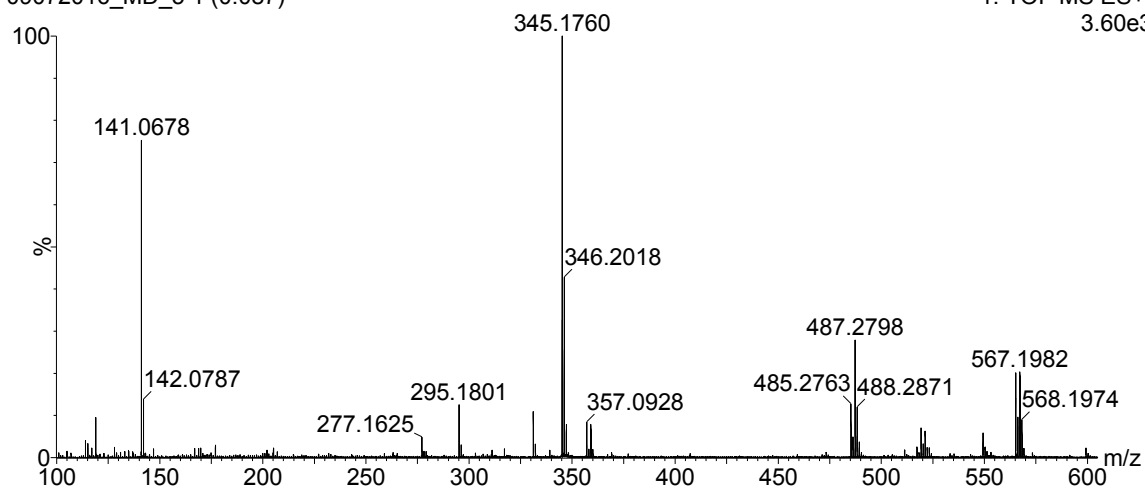

SI 5c. HRMS of compound 5

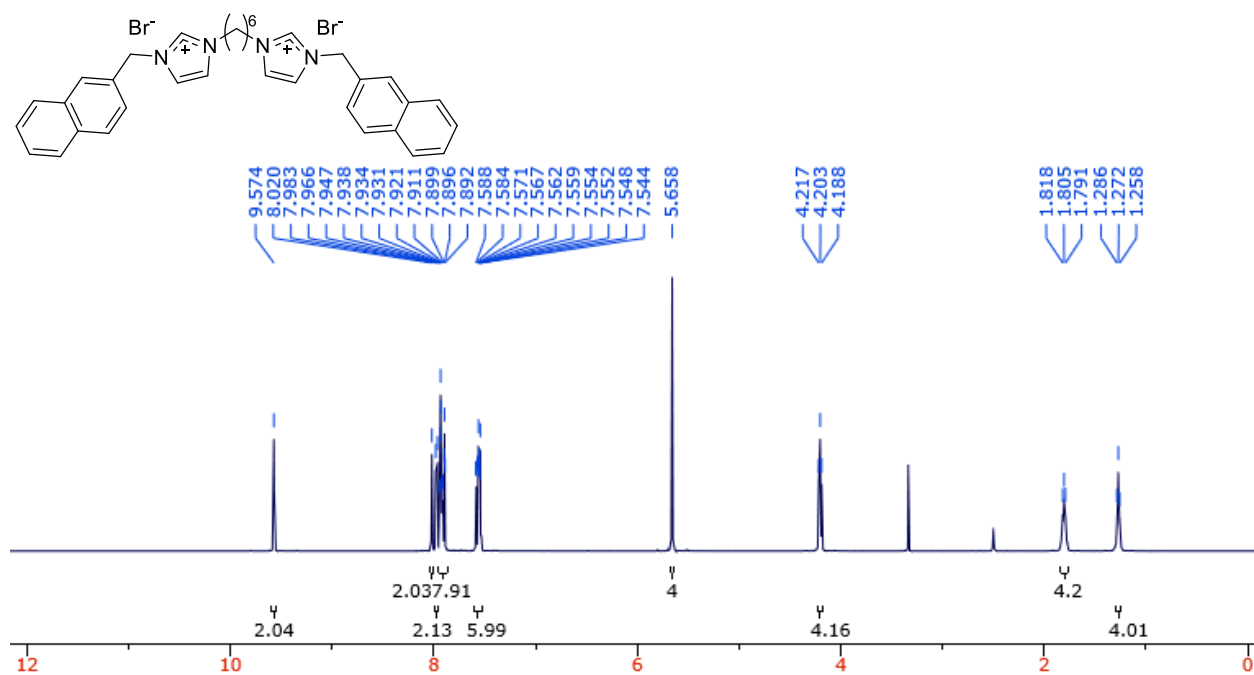

SI 6a. <sup>1</sup>H NMR spectrum of compound 6

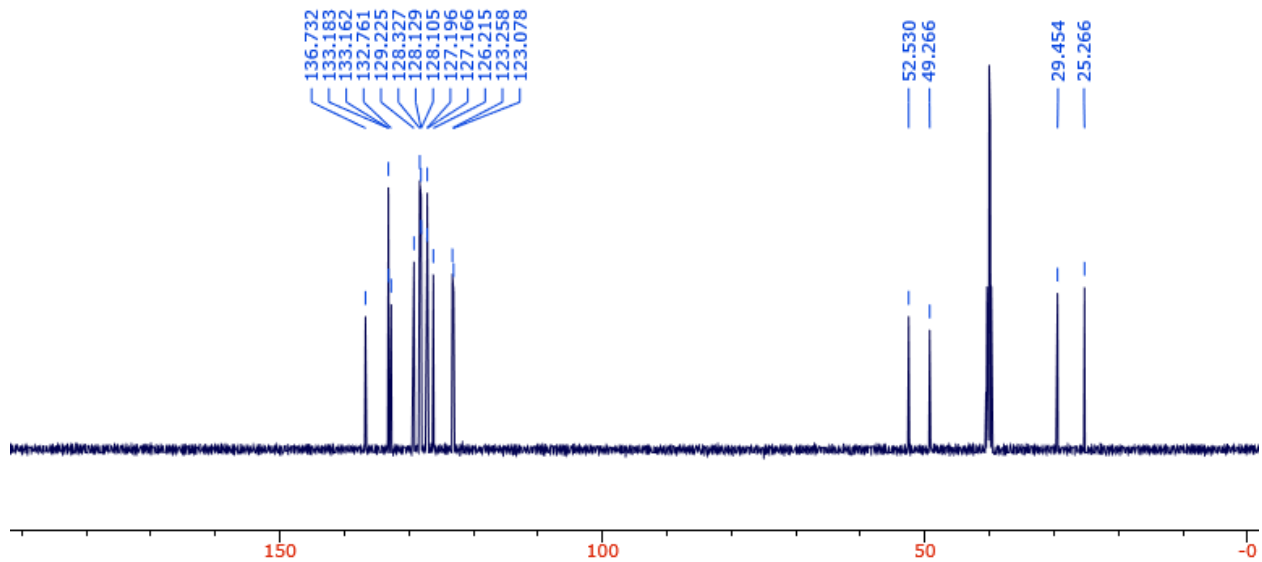

SI 6b.  $^{13}\text{C}$  NMR spectrum of compound 6

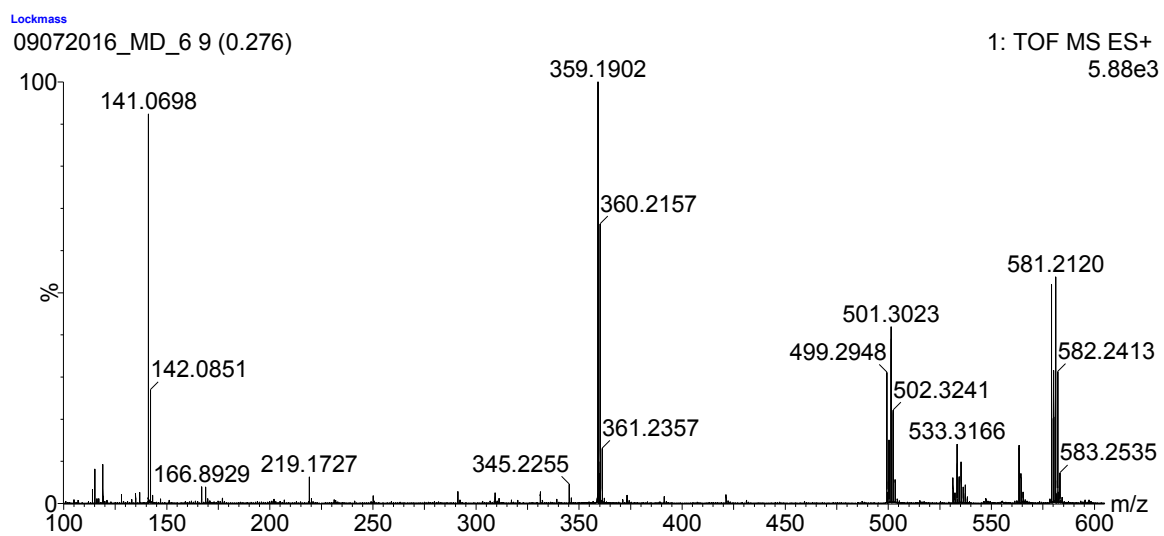

SI 6c. HRMS of compound 6

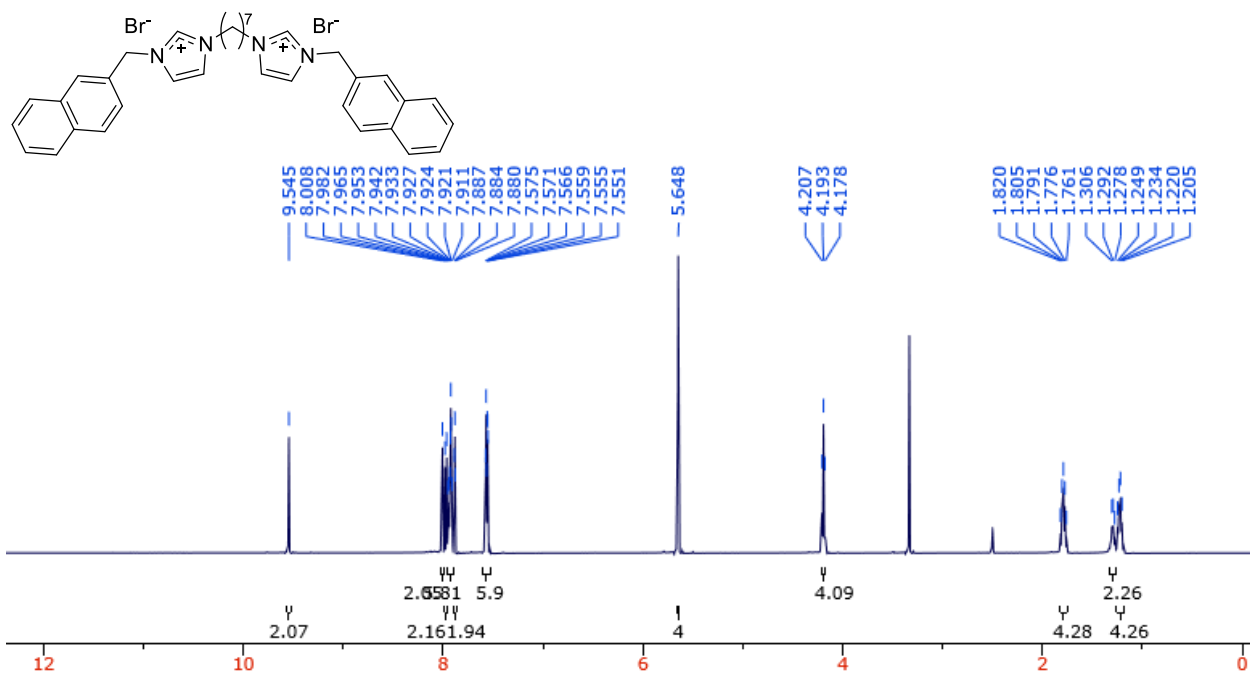

SI 7a. <sup>1</sup>H NMR spectrum of compound 7

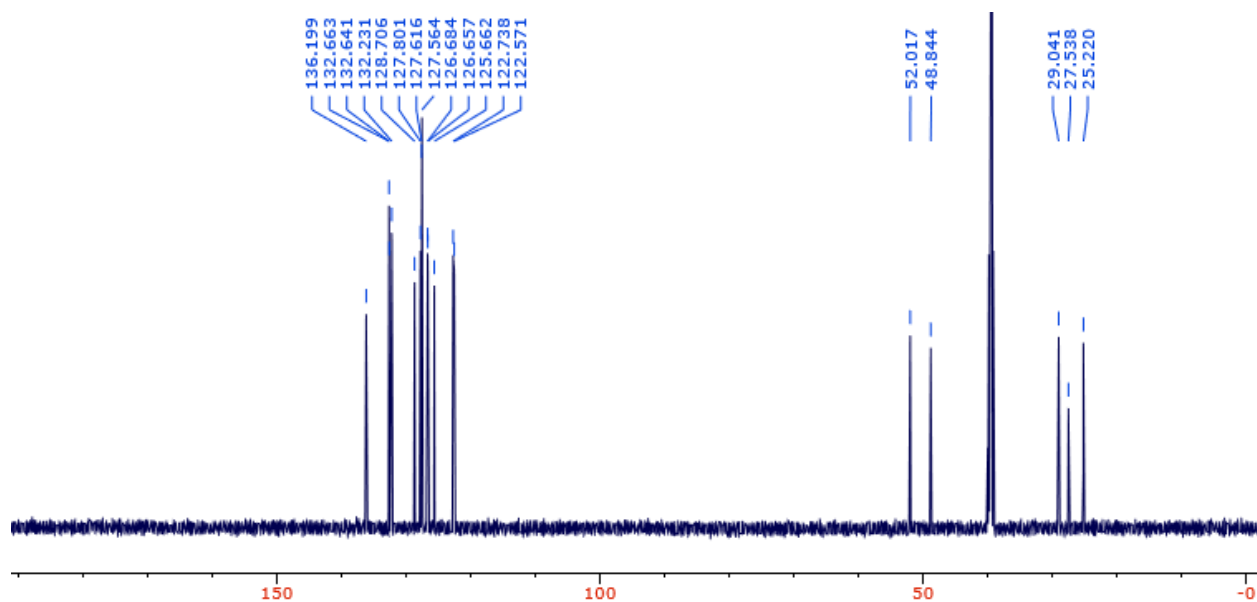

SI 7b. <sup>13</sup>C NMR spectrum of compound 7

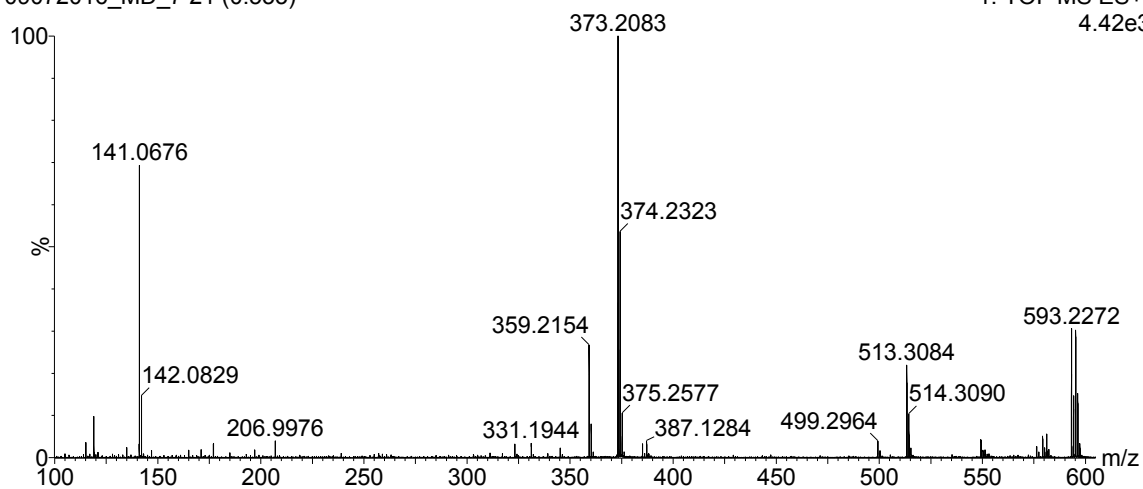

SI 7c. HRMS of compound 7

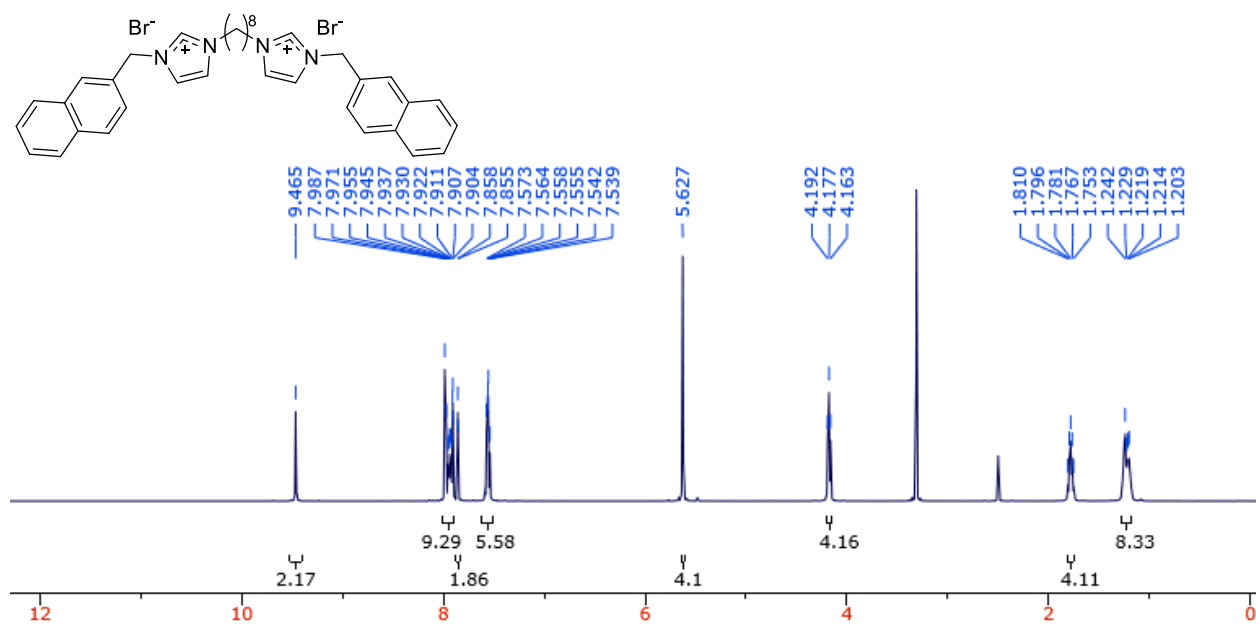SI 8a. <sup>1</sup>H NMR spectrum of compound 8

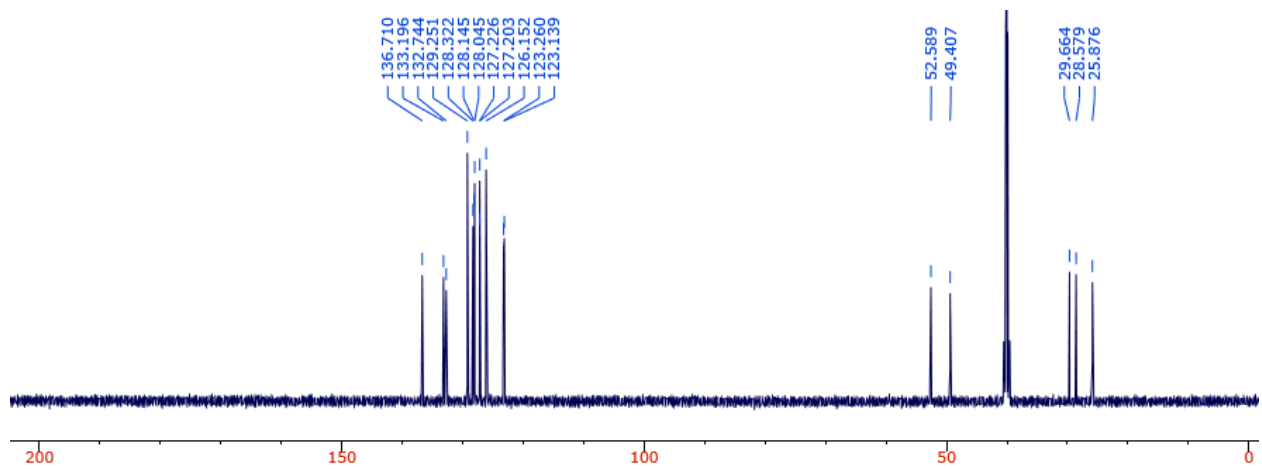

SI 8b. <sup>13</sup>C NMR spectrum of compound 8

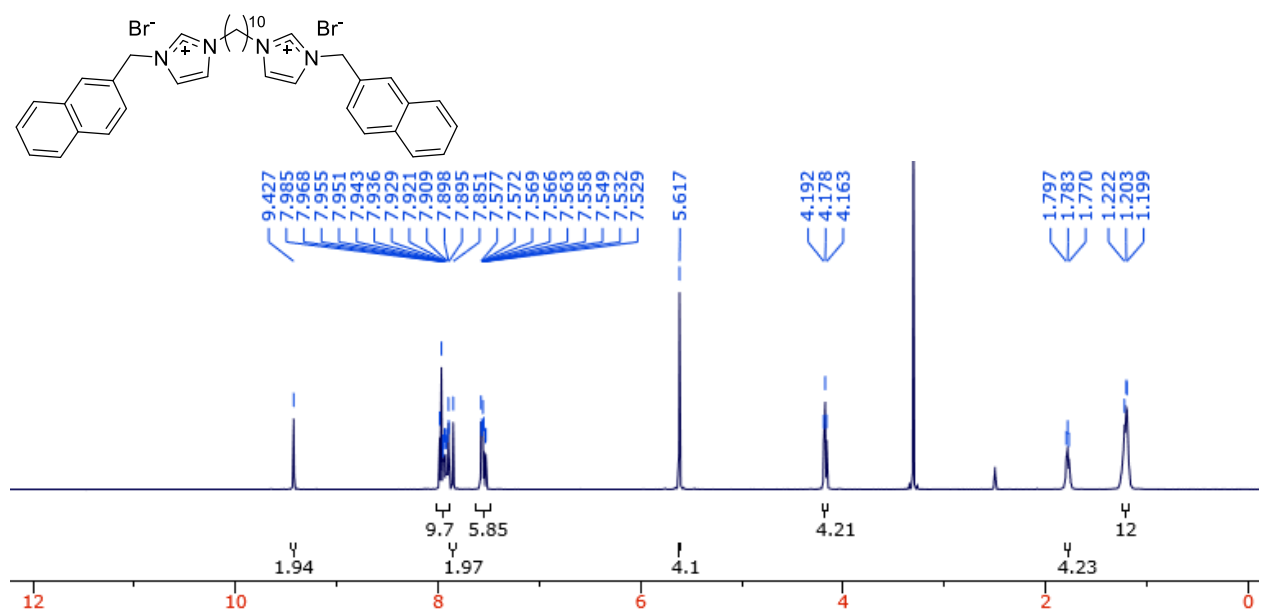

SI 9a. <sup>1</sup>H NMR spectrum of compound 10

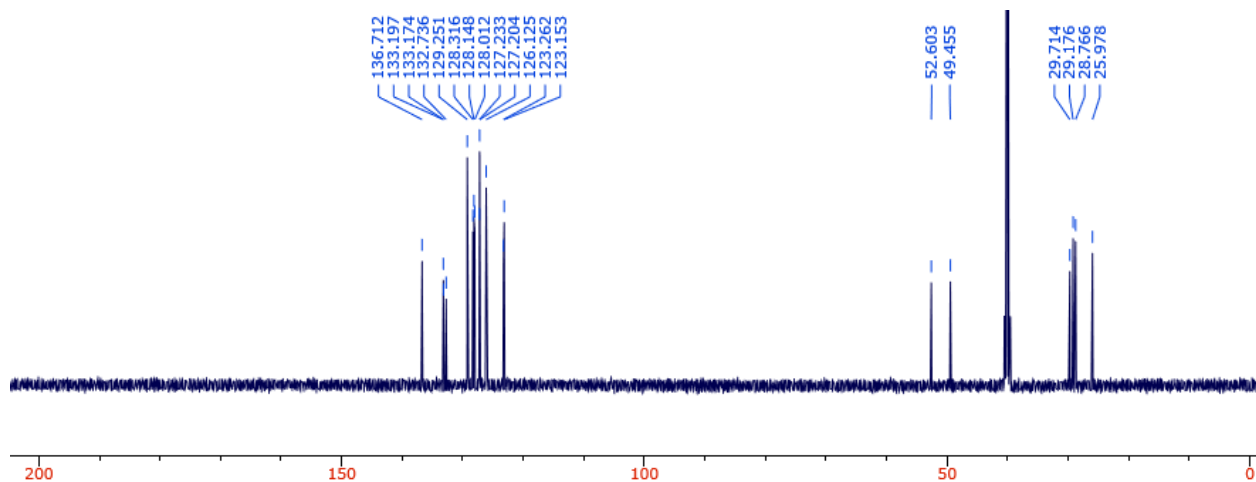

SI 9b.  $^{13}\text{C}$  NMR spectrum of compound 10

Lockmass

09072016\_MD\_10 12 (0.327)

1: TOF MS ES+  
3.16e3

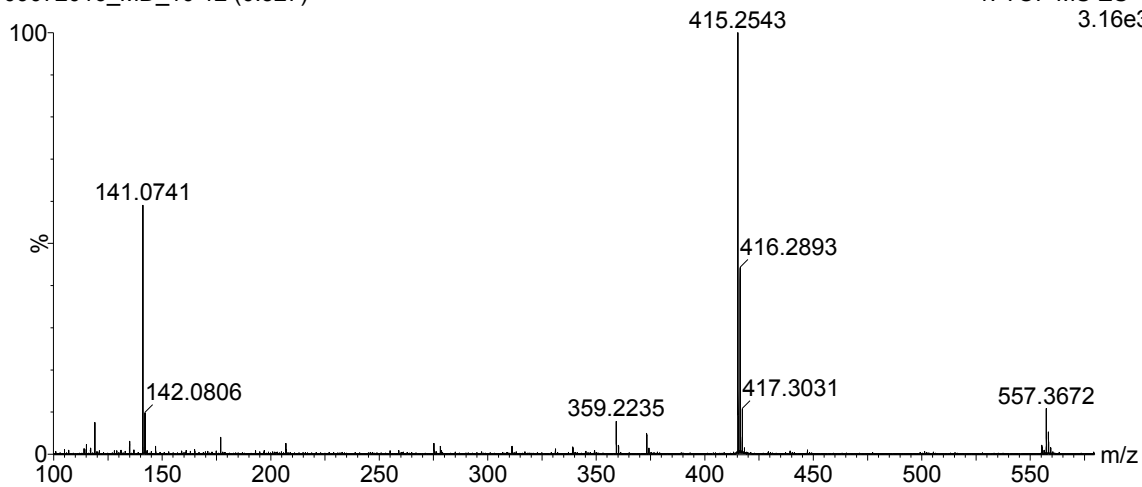

SI 9c. HRMS of compound 10

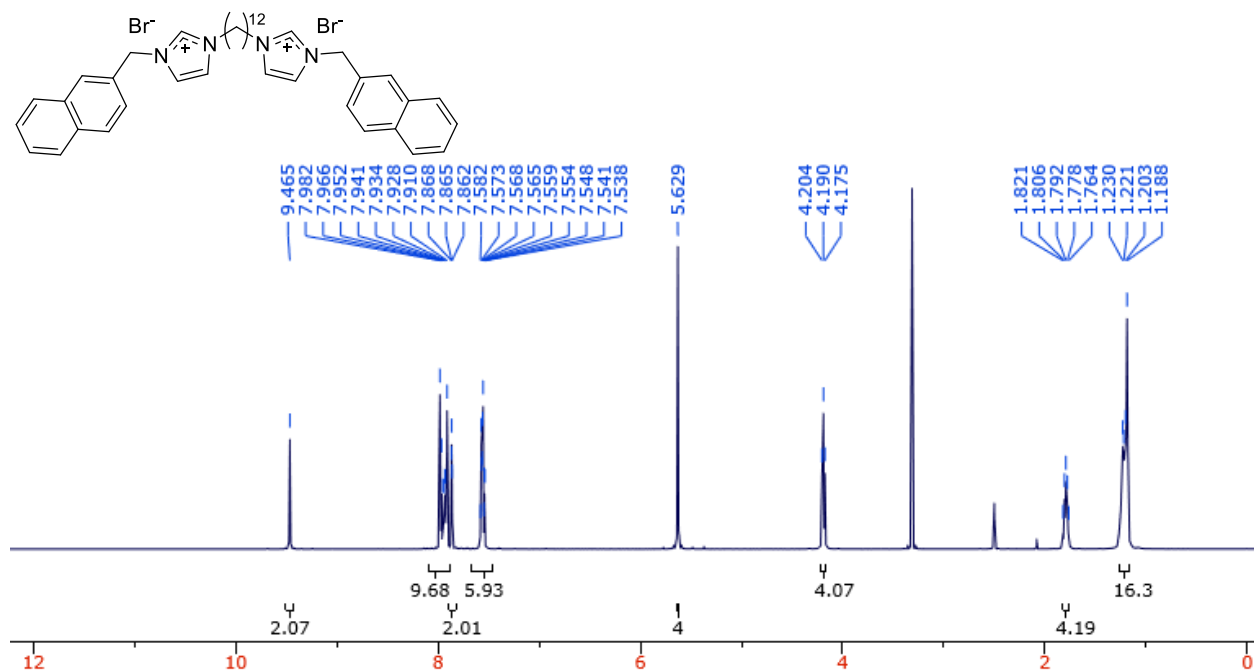

SI 10a. <sup>1</sup>H NMR spectrum of compound 12

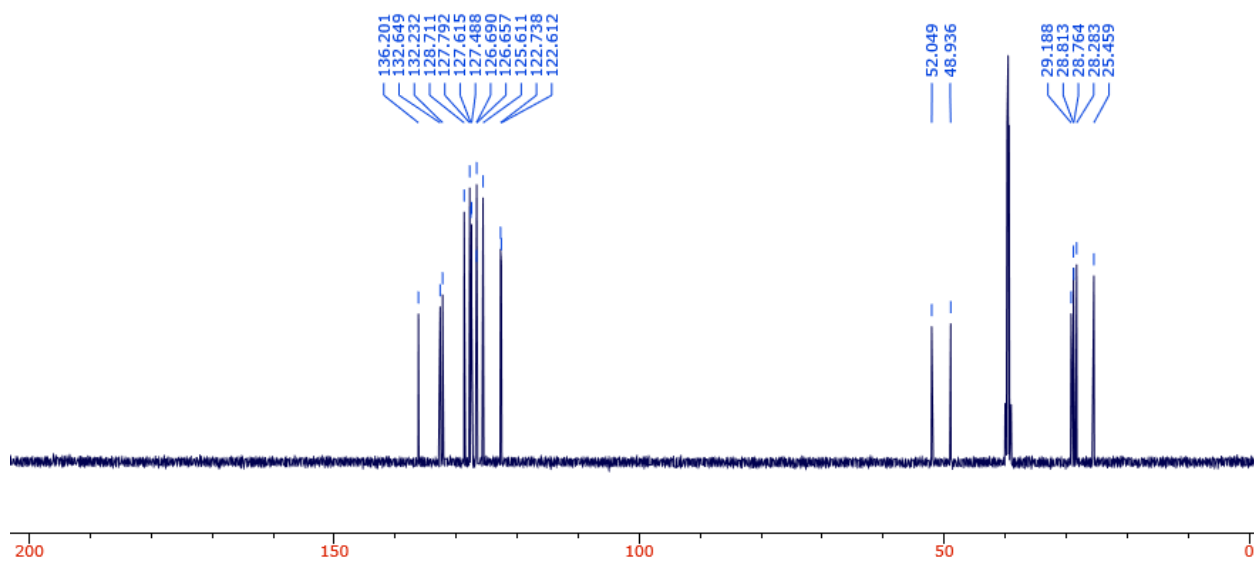

SI 10b. <sup>13</sup>C NMR spectrum of compound 12

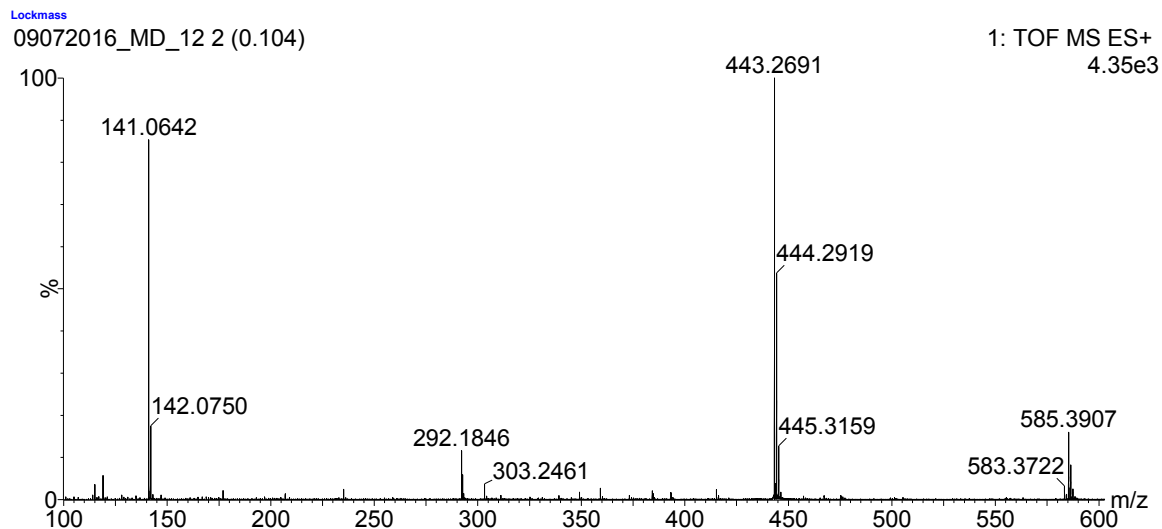

SI 10c. HRMS of compound 12

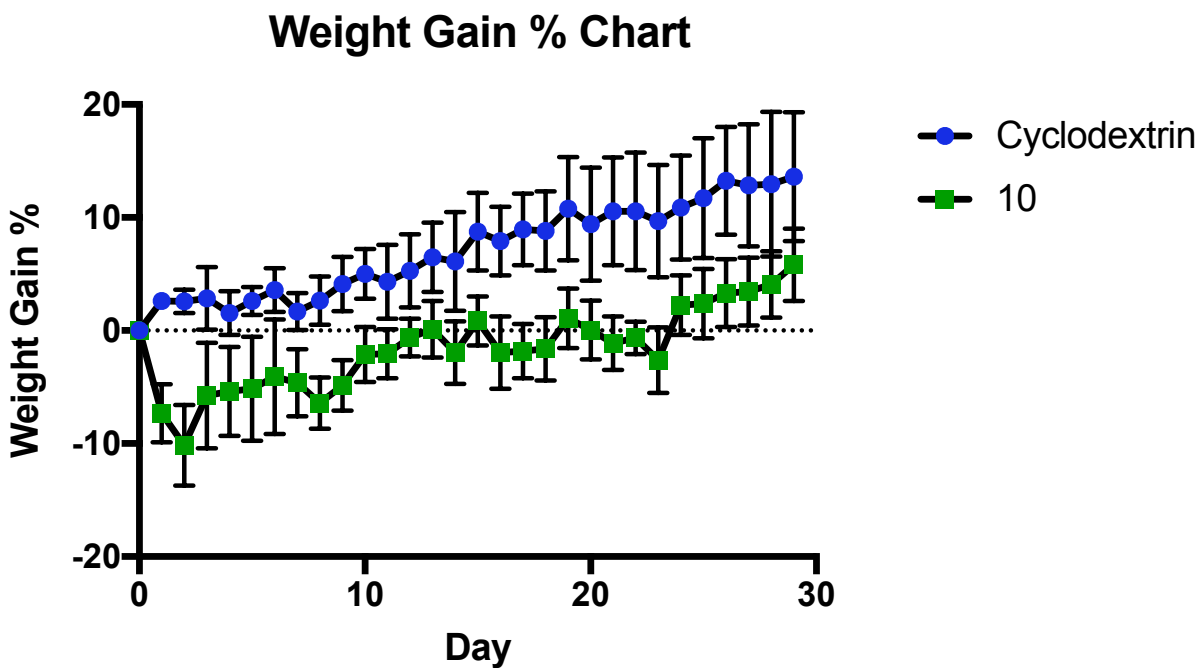

SI 11. Average weight gain chart with error bars (n=3) for mice treated with **10** or cyclodextrin vehicle control

SI 12. References

- (1) American Cancer Society. *Cancer Facts and Figures 2020*. Atlanta: American Cancer Society; 2020.
- (2) Ramalingam, S.; Sandler, A. B. *Oncol. Lung Cancer* **2006**, *11*, 655–665.
- (3) Dempke, W. C. M.; Suto, T.; Reck, M. *Lung Cancer* **2010**, *67*, 257–274.



- (4) Wright, B. D.; Deblock, M. C.; Wagers, P. O.; Duah, E.; Robishaw, N. K.; Shelton, K. L.; Southerland, M. R.; DeBord, M. A.; Kersten, K. M.; McDonald, L. J.; Stiel, J. a.; Panzner, M. J.; Tessier, C. A.; Paruchuri, S.; Youngs, W. J. *Med. Chem. Res.* **2015**, *24* (7), 2838–2861.
- (5) Shelton, K. L.; DeBord, M. A.; Wagers, P. O.; Southerland, M. R.; Taraboletti, A.; Robishaw, N. K.; Jackson, D. P.; Tosanovic, R.; Kofron, W. G.; Tessier, C. A.; Paruchuri, S.; Shriver, L. P.; Panzner, M. J.; Youngs, W. J. *Tetrahedron* **2016**, *72* (38), 5729–5743.
- (6) Xu, X.; Yu, C.; Chen, W.; Li, Y.; Yang, L.-J.; Li, Y.; Zhang, H.-B.; Yang, X.-D. *Org. Biomol. Chem.* **2015**, *13*, 1550–1557.
- (7) Zeng, X.; Yang, X.; Zhang, Y.; Qing, C.; Zhang, H. *Bioorganic Med. Chem. Lett.* **2010**, *20* (6), 1844–1847.
- (8) Sun, C.-J.; Chen, W.; Li, Y.; Liu, L.-X.; Wang, X.-Q.; Li, L.-J.; Zhang, H.-B.; Yang, X.-D. *RSC Adv.* **2014**, *4* (31), 16312.
- (9) Chen, W.; Deng, X.-Y.; Li, Y.; Yang, L.-J.; Wan, W.-C.; Wang, X.-Q.; Zhang, H.-B.; Yang, X.-D. *Bioorg. Med. Chem. Lett.* **2013**, *23*, 4297–4302.
- (10) Chen, W.; Yang, X.-D.; Li, Y.; Yang, L.-J.; Wang, X.-Q.; Zhang, G.-L.; Zhang, H.-B. *Org. Biomol. Chem.* **2011**, *9*, 4250–4255.
- (11) Cui, B.; Zheng, B. L.; He, K.; Zheng, Q. Y. *J. Nat. Prod.* **2003**, *66* (8), 1101–1103.
- (12) Liu, L.; Wang, X.; Yan, J.; Li, Y.; Sun, C.; Chen, W.; Zhou, B.; Zhang, H.; Yang, X. *Eur. J. Med. Chem.* **2013**, *66*, 423–437.
- (13) Malhotra, S. V.; Kumar, V. *Bioorganic Med. Chem. Lett.* **2010**, *20* (2), 581–585.
- (14) Riduan, S. N.; Zhang, Y. *Chem. Soc. Rev.* **2013**, *42* (23), 9055–9070.
- (15) Xu, X.; Wang, J.; Yu, C.; Chen, W.; Li, Y.; Li, Y.; Zhang, H.; Yang, X. *Bioorg. Med. Chem. Lett.* **2014**, *24*, 4926–4930.
- (16) Gao, Y.; Vlahakis, J. Z.; Szarek, W. A.; Brockhausen, I. *Bioorg. Med. Chem.* **2013**, *21*, 1305–1311.
- (17) Jurgens, E.; Buys, K. N.; Schmidt, A.-T.; Furfari, S. K.; Cole, M. L.; Moser, M.; Rominger, F.; Kunz, D. *New J. Chem.* **2016**.
- (18) Pinto, M. F.; Cardoso, B. de P.; Barroso, S.; Martins, A. M.; Royo, B. *Dalton Trans.* **2016**, *45*, 13541–13546.
- (19) Jarikote, D. V.; Li, W.; Jiang, T.; Eriksson, L. A.; Murphy, P. V. *Bioorg. Med. Chem.* **2011**, *19*, 826–835.
- (20) Kong, D.; Park, E. J.; Stephen, A. G.; Calvani, M.; Cardellina, J. H.; Monks, A.; Fisher, R. J.; Shoemaker, R. H.; Melillo, G. *Cancer Res.* **2005**, *65* (19), 9047–9055.
- (21) Kim, Y. B.; Kim, Y. H.; Park, J. Y.; Kim, S. K. *Bioorg. Med. Chem. Lett.* **2004**, *14* (2), 541–544.
- (22) Wagers, P. O.; Tiemann, K. M.; Shelton, K. L.; Kofron, W. G.; Panzner, M. J.; Wooley, K. L.; Youngs,

- W. J.; Hunstad, D. a. *Antimicrob. Agents Chemother.* **2015**, *59* (9), AAC.00881-15.
- (23) Shelton, K. L.; Debord, M. A.; Wagers, P. O.; Southerland, M. R.; Williams, T. M.; Robishaw, N. K.; Shriver, L. P.; Tessier, C. A.; Panzner, M. J.; Youngs, W. J.; Williams, T. M.; Robishaw, N. K.; Shriver, L. P.; Tessier, C. A.; Panzner, M. J.; Youngs, W. J. *Bioorg. Med. Chem.* **2016**.
- (24) Debord, M. A.; Wagers, P. O.; Crabtree, S. R.; Tessier, C. A.; Panzner, M. J.; Youngs, W. J. *Bioorg. Med. Chem. Lett.* **2016**.
- (25) Brewster, M. E.; Loftsson, T. *Adv. Drug Deliv. Rev.* **2007**, *59* (7), 645–666.
- (26) Haque, R. A.; Hasanudin, N.; Iqbal, M. A.; Ahmad, A.; Hashim, S.; Majid, A. A.; Ahamed, M. B. K. *J. Coord. Chem.* **2013**, *66* (18), 3211–3228.
- (27) Bruker. SMART (Version 5.625). Madison, Wisconsin, USA: Bruker AXS Inc.; **2012**.
- (28) Bruker. APEX II. Madison, Wisconsin, USA: Bruker AXS Inc.; **2012**.
- (29) Bruker. SAINT. Madison, Wisconsin, USA. Bruker AXS Inc.; **2012**.
- (30) Bruker. SADABS. Madison, Wisconsin, USA: Bruker AXS Inc.; **2012**.
- (31) Sheldrick, G. M. *Acta Crystallogr. Sect. C Struct. Chem.* **2015**, *71* (Md), 3–8.
